# Supplementary material for: Boron complexes of thiazole-bridged 1,5-bidentate nitrogen ligands: synthesis and acid-responsive photophysical properties
Source: Royal Society of Chemistry journal article supplement (doi:10.1039/d1ob00828e), 2021-01-01

## Supporting Information

### **Boron complexes of thiazole-bridged 1,5-bidentate nitrogen ligands: synthesis and acid-responsive photophysical properties**

Khurnia Krisna Puji Pamungkas, Toshifumi Maruyama and Toshiaki Murai\*

Department of Chemistry and Biomolecular Science, Faculty of Engineering, Gifu University, Yanagido,  
Gifu 501-1193, Japan.

Email: [mtoshi@gifu-u.ac.jp](mailto:mtoshi@gifu-u.ac.jp)

## Contents

|                                                                                                                                                         |    |
|---------------------------------------------------------------------------------------------------------------------------------------------------------|----|
| Photophysical properties of 1,5-bidentate nitrogen ligands ( <b>Tz</b> ) and boron complexes ( <b>BF<sub>2</sub>Tz</b> ).                               | 3  |
| Table S1 Photophysical properties of <b>Tz</b> .                                                                                                        | 3  |
| Fig. S1 Absorption (left) and emission (right) of <b>BF<sub>2</sub>Tz 1</b> .                                                                           | 3  |
| Table S2 Photophysical properties of <b>BF<sub>2</sub>Tz 1</b> .                                                                                        | 4  |
| Fig. S2 Absorption (left) and emission (right) of <b>BF<sub>2</sub>Tz 2</b> .                                                                           | 4  |
| Table S3 Photophysical properties of <b>BF<sub>2</sub>Tz 2</b> .                                                                                        | 4  |
| Fig. S3 Absorption (left) and emission(left) spectra of <b>BF<sub>2</sub>Tz 3</b> .                                                                     | 5  |
| Table S4 Photophysical properties of <b>BF<sub>2</sub>Tz 3</b> .                                                                                        | 5  |
| Fig. S4 Absorption (left) and emission (left) properties of <b>BF<sub>2</sub>Tz 4</b> .                                                                 | 5  |
| Table S5 Photophysical properties of <b>BF<sub>2</sub>Tz 4</b> .                                                                                        | 6  |
| Halochromic properties of <b>BF<sub>2</sub>Tz 4</b> upon the addition of acids.                                                                         | 6  |
| Table S6 Photophysical properties of <b>BF<sub>2</sub>Tz 4</b> upon addition of B(C <sub>6</sub> F <sub>5</sub> ) <sub>3</sub> .                        | 6  |
| Table S7 Photophysical properties of <b>BF<sub>2</sub>Tz 4</b> upon addition of TfOH.                                                                   | 7  |
| Table S8 Photophysical properties of <b>BF<sub>2</sub>Tz 4</b> upon addition of TFA.                                                                    | 7  |
| Halochromic properties of <b>BF<sub>2</sub>Tz 3</b> upon the addition of acids                                                                          | 8  |
| Fig. S5 Absorption (left) and emission (left) properties of <b>BF<sub>2</sub>Tz 3</b> upon addition of B(C <sub>6</sub> F <sub>5</sub> ) <sub>3</sub> . | 8  |
| Table S9 Photophysical properties of <b>BF<sub>2</sub>Tz 3</b> upon addition of B(C <sub>6</sub> F <sub>5</sub> ) <sub>3</sub> .                        | 8  |
| Photophysical properties of <b>BF<sub>2</sub>Tz</b> in a solid state.                                                                                   | 9  |
| Fig. S6 Absorption and emission spectra of <b>BF<sub>2</sub>Tz 2</b> and <b>BF<sub>2</sub>Tz 3</b> in a solid state.                                    | 9  |
| Table S10 Photophysical properties of <b>BF<sub>2</sub>Tz</b> in a solid state.                                                                         | 9  |
| Fig. S7 Emission of <b>BF<sub>2</sub>Tz 2</b> and <b>BF<sub>2</sub>Tz 3</b> in a solid state.                                                           | 10 |
| X-ray crystallography data of <b>BF<sub>2</sub>Tz 1</b> .                                                                                               | 11 |
| Table S11 X-ray crystallography data of <b>BF<sub>2</sub>Tz 1</b> .                                                                                     | 11 |
| <sup>1</sup> H and <sup>13</sup> C NMR charts for <b>Tz</b> and <b>BF<sub>2</sub>Tz</b> .                                                               | 12 |

Photophysical properties of 1,5-bidentate nitrogen ligands (**Tz**) and boron complexes (**BF<sub>2</sub>Tz**).

Table S1 Photophysical properties of **Tz**.

| Thiazole    | Solvent                     | Toluene        | CHCl <sub>3</sub> |
|-------------|-----------------------------|----------------|-------------------|
| <b>Tz 1</b> | $\lambda_{\text{abs}}$ (nm) | 377<br>398     | 373<br>404        |
|             | $\log \epsilon$             | 4.37<br>4.37   | 4.28<br>4.28      |
|             | -----                       |                |                   |
| <b>Tz 2</b> | $\lambda_{\text{abs}}$ (nm) | 372<br>399 (s) | 370<br>404        |
|             | $\log \epsilon$             | 4.29<br>4.26   | 4.12<br>4.12      |
|             | -----                       |                |                   |
| <b>Tz 3</b> | $\lambda_{\text{abs}}$ (nm) | 371<br>404 (s) | 369<br>403        |
|             | $\log \epsilon$             | 4.36<br>4.30   | 4.18<br>4.16      |
|             | -----                       |                |                   |
| <b>Tz 4</b> | $\lambda_{\text{abs}}$ (nm) | 374<br>398     | 367<br><b>411</b> |
|             | $\log \epsilon$             | 4.56<br>4.56   | 4.13<br>4.12      |
|             | -----                       |                |                   |

conc. = 10<sup>-5</sup> M

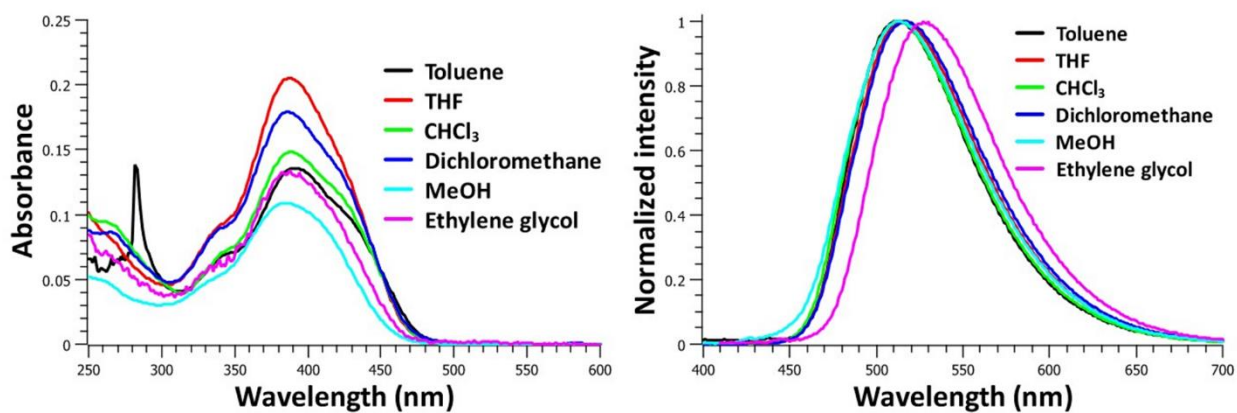

Fig. S1 Absorption (left) and emission (right) of **BF<sub>2</sub>Tz 1**.

Table S2 Photophysical properties of **BF<sub>2</sub>Tz 1**.

| Solvent                         | $\lambda_{\text{abs}}$ (nm) | $\lambda_{\text{ex}}$ (nm) | $\lambda_{\text{em}}$ (nm) <sup>a</sup> | $\nu_{\text{ss}}$ [cm <sup>-1</sup> ] (nm) | $\Phi_{\text{F}}$ <sup>b</sup> |
|---------------------------------|-----------------------------|----------------------------|-----------------------------------------|--------------------------------------------|--------------------------------|
| toluene                         | 391                         | 385                        | 513                                     | [6082] (122)                               | 0.12                           |
| THF                             | 388                         | 381                        | 514                                     | [6317] (126)                               | 0.28                           |
| CHCl <sub>3</sub>               | 388                         | 381                        | 513                                     | [6280] (125)                               | 0.28                           |
| CH <sub>2</sub> Cl <sub>2</sub> | 386                         | 379                        | 518                                     | [6601] (132)                               | 0.48                           |
| MeOH                            | 385                         | 377                        | 513                                     | [6480] (128)                               | 0.28                           |
| ethylene glycol                 | 388                         | 381                        | 513                                     | [6280] (125)                               | 0.49                           |

<sup>a</sup> Excited at  $\lambda_{\text{max}}$ <sup>b</sup> Absolute fluorescence quantum yieldconc. = 10<sup>-5</sup> M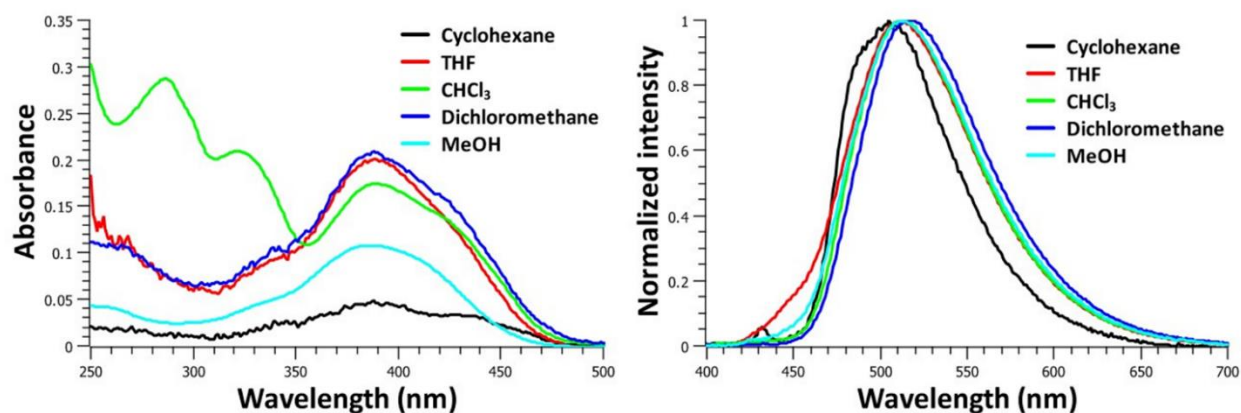Fig. S2 Absorption (left) and emission (right) of **BF<sub>2</sub>Tz 2**.Table S3 Photophysical properties of **BF<sub>2</sub>Tz 2**.

| Solvent                         | $\lambda_{\text{abs}}$ (nm) | $\lambda_{\text{ex}}$ (nm) | $\lambda_{\text{em}}$ (nm) <sup>a</sup> | $\nu_{\text{ss}}$ [cm <sup>-1</sup> ] (nm) | $\Phi_{\text{F}}$ <sup>b</sup> |
|---------------------------------|-----------------------------|----------------------------|-----------------------------------------|--------------------------------------------|--------------------------------|
| Cyclohexane                     | 388                         | 7.58                       | 505                                     | 5971 [117]                                 | 0.08                           |
| THF                             | 389                         | 7.58                       | 511                                     | 6137 [122]                                 | 0.23                           |
| CHCl <sub>3</sub>               | 389                         | 7.58                       | 512                                     | 6175 [123]                                 | 0.37                           |
| CH <sub>2</sub> Cl <sub>2</sub> | 388                         | 7.58                       | 518                                     | 6468 [130]                                 | 0.23                           |
| MeOH                            | 386                         | 7.58                       | 511                                     | 6337 [125]                                 | 0.32                           |

<sup>a</sup> Excited at  $\lambda_{\text{max}}$ <sup>b</sup> Absolute fluorescence quantum yieldconc. = 10<sup>-5</sup> M

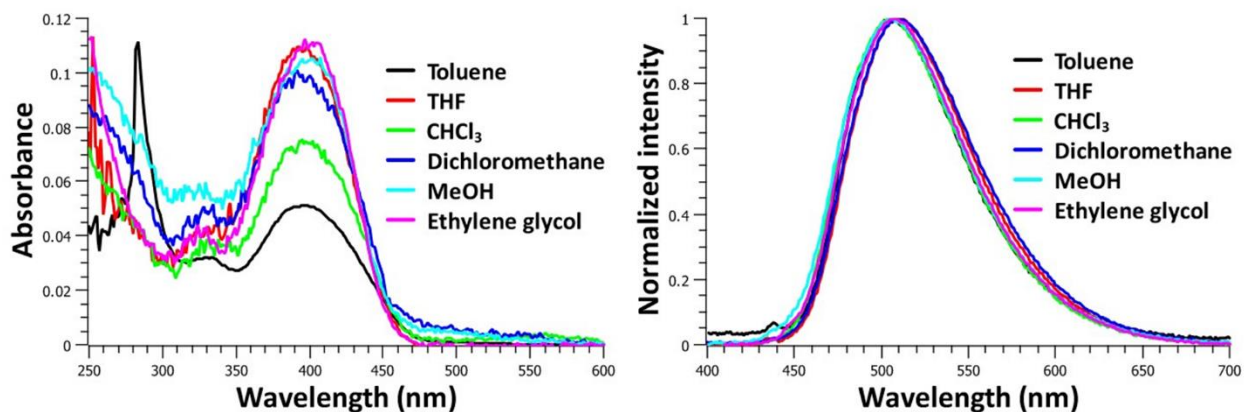

Fig. S3 Absorption (left) and emission(left) spectra of **BF<sub>2</sub>Tz 3**.

Table S4 Photophysical properties of **BF<sub>2</sub>Tz 3**.

| Solvent                         | $\lambda_{\text{abs}}$ (nm) | $\lambda_{\text{ex}}$ (nm) | $\lambda_{\text{em}}$ (nm) <sup>a</sup> | $\nu_{\text{ss}}$ [cm <sup>-1</sup> ] (nm) | $\Phi_{\text{F}}$ <sup>b</sup> |
|---------------------------------|-----------------------------|----------------------------|-----------------------------------------|--------------------------------------------|--------------------------------|
| toluene                         | 397                         | 386                        | 507                                     | [5465] (110)                               | 0.23                           |
| THF                             | 393                         | 385                        | 511                                     | [5875] (118)                               | 0.27                           |
| CHCl <sub>3</sub>               | 395                         | 389                        | 504                                     | [5475] (109)                               | 0.36                           |
| CH <sub>2</sub> Cl <sub>2</sub> | 392                         | 385                        | 509                                     | [5863] (117)                               | 0.49                           |
| MeOH                            | 401                         | 386                        | 505                                     | [5135] (104)                               | 0.34                           |
| ethylene glycol                 | 397                         | 395                        | 508                                     | [5503] (111)                               | 0.29                           |

<sup>a</sup> Excited at  $\lambda_{\text{max}}$

<sup>b</sup> Absolute fluorescence quantum yield

conc. = 10<sup>-5</sup> M

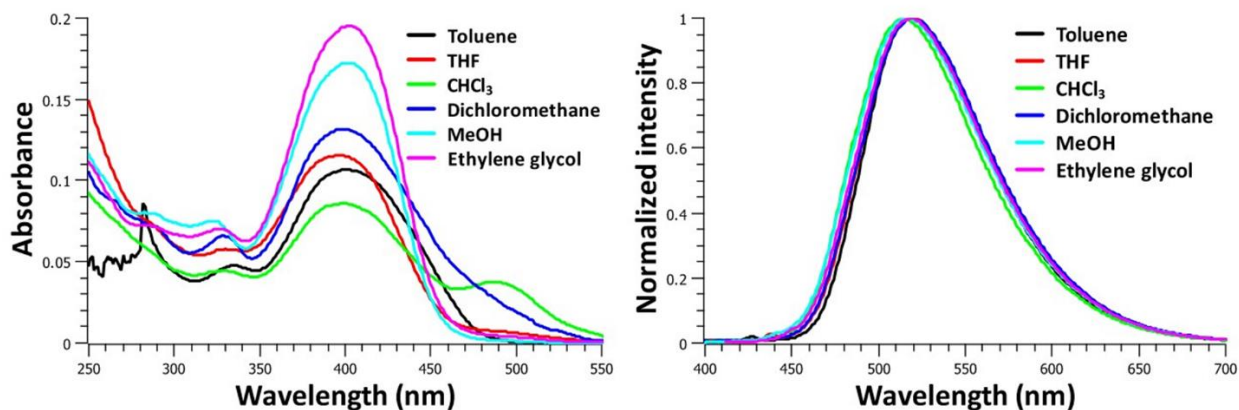

Fig. S4 Absorption (left) and emission (left) properties of **BF<sub>2</sub>Tz 4**.

Table S5 Photophysical properties of **BF<sub>2</sub>Tz 4**.

| Solvent                         | $\lambda_{\text{abs}}$ (nm) | $\log \varepsilon$ | $\lambda_{\text{ex}}$ (nm) | $\lambda_{\text{em}}$ (nm) <sup>a</sup> | $\nu_{\text{ss}}$ [cm <sup>-1</sup> ] (nm) | $\Phi_{\text{F}}$ <sup>b</sup> |
|---------------------------------|-----------------------------|--------------------|----------------------------|-----------------------------------------|--------------------------------------------|--------------------------------|
| toluene                         | 399                         | 4.02               | 377                        | 518                                     | [5757] (119)                               | 0.09                           |
| THF                             | 398                         | 4.06               | 387                        | 517                                     | [5783] (119)                               | 0.20                           |
| CHCl <sub>3</sub>               | <b>398</b><br>484 (s)       | 4.11               | 392                        | 516                                     | [5745] (118)                               | 0.12                           |
| CH <sub>2</sub> Cl <sub>2</sub> | 398                         | 4.11               | 385                        | 519                                     | [5857] (121)                               | 0.07                           |
| MeOH                            | 402                         | 4.23               | 389                        | 515                                     | [5458] (113)                               | 0.06                           |
| ethylene glycol                 | 403                         | 4.29               | 396                        | 519                                     | [5546] (116)                               | 0.07                           |

<sup>a</sup> Excited at  $\lambda_{\text{max}}$     <sup>b</sup> Absolute fluorescence quantum yield    conc. = 10<sup>-5</sup> M

Halochromic properties of **BF<sub>2</sub>Tz 4** upon the addition of acids.Table S6 Photophysical properties of **BF<sub>2</sub>Tz 4** upon addition of B(C<sub>6</sub>F<sub>5</sub>)<sub>3</sub>.

| Equivalent | $\lambda_{\text{abs}}$ (nm) | $\log \varepsilon$ | $\lambda_{\text{ex}}$ (nm) | $\lambda_{\text{em}}$ (nm) <sup>a</sup> | $\nu_{\text{ss}}$ [cm <sup>-1</sup> ] (nm) | $\Phi_{\text{F}}$ <sup>b</sup> |
|------------|-----------------------------|--------------------|----------------------------|-----------------------------------------|--------------------------------------------|--------------------------------|
| 0          | 402                         | 3.77               | 377                        | <b>518</b>                              | [5570] (116)                               | 0.12                           |
| 0.1        | 402                         | 3.77               | 377                        | <b>519</b>                              | [5607] (117)                               | 0.12                           |
| 0.2        | 403                         | 3.76               | 376                        | <b>522</b>                              | [5656] (119)                               | 0.12                           |
| 0.4        | <b>403</b><br>474           | 4.25               | 425                        | <b>527</b>                              | [2121] (53)                                | 0.09                           |
| 0.6        | 402<br>477                  | 4.57               | 457                        | <b>544</b>                              | [2582] (67)                                | 0.07                           |
| 0.8        | 403<br>478                  | 4.67               | 467                        | <b>546</b>                              | [2605] (68)                                | 0.06                           |
| 1          | 402<br>478                  | 4.68               | 468                        | <b>546</b>                              | [2605] (68)                                | 0.08                           |

<sup>a</sup> Excited at  $\lambda_{\text{max}}$     <sup>b</sup> Absolute fluorescence quantum yield    conc. = 10<sup>-5</sup> M in toluene

Table S7 Photophysical properties of **BF<sub>2</sub>Tz 4** upon addition of TfOH.

| Equivalent | $\lambda_{\text{abs}}$ (nm) | $\log \epsilon$ | $\lambda_{\text{ex}}$ (nm) | $\lambda_{\text{em}}$ (nm) <sup>a</sup> | $\nu_{\text{ss}}$ [cm <sup>-1</sup> ] (nm) | $\Phi_{\text{F}}$ <sup>b</sup> |
|------------|-----------------------------|-----------------|----------------------------|-----------------------------------------|--------------------------------------------|--------------------------------|
| 0          | 398                         | 3.22            | 397                        | <b>515</b>                              | [5708] (117)                               | 0.12                           |
| 0.2        | 398                         | 3.20            | 400                        | <b>519</b>                              | [5857] (121)                               | 0.03                           |
| 0.4        | <b>398</b><br>452 (s)       | 3.13            | 447                        | <b>518</b>                              | [5820] (120)                               | 0.04                           |
| 0.6        | 466                         | 3.20            | 471                        | <b>552</b>                              | [3343] (86)                                | 0.01                           |
| 0.8        | 469                         | 3.23            | 473                        | <b>554</b>                              | [3271] (85)                                | 0.01                           |
| 1          | 469                         | 3.28            | 474                        | <b>562</b>                              | [3528] (93)                                | 0.03                           |

<sup>a</sup> Excited at  $\lambda_{\text{max}}$     <sup>b</sup> Absolute fluorescence quantum yield    conc. = 10<sup>-5</sup> M in toluene

Table S8 Photophysical properties of **BF<sub>2</sub>Tz 4** upon addition of TFA.

| Equivalent | $\lambda_{\text{abs}}$ (nm) | $\log \epsilon$ | $\lambda_{\text{ex}}$ (nm) | $\lambda_{\text{em}}$ (nm) <sup>a</sup> | $\nu_{\text{ss}}$ [cm <sup>-1</sup> ] (nm) | $\Phi_{\text{F}}$ <sup>b</sup> |
|------------|-----------------------------|-----------------|----------------------------|-----------------------------------------|--------------------------------------------|--------------------------------|
| 0          | <b>404</b>                  | 3.37            | 400                        | <b>514</b>                              | [5297] (110)                               | 0.23                           |
| 1          | <b>404</b>                  | 3.36            | 398                        | <b>519</b>                              | [5484] (115)                               | 0.22                           |
| 2          | <b>418</b>                  | 3.36            | 409                        | <b>518</b>                              | [4618] (100)                               | 0.19                           |
| 4          | 428                         | 3.37            | 432                        | <b>524</b>                              | [4280] (96)                                | 0.13                           |
| 6          | 428                         | 3.36            | 434                        | <b>531</b>                              | [4532] (103)                               | 0.13                           |
| 8          | 434                         | 3.36            | 432                        | <b>530</b>                              | [4173] (96)                                | 0.15                           |
| 10         | 435                         | 3.35            | 437                        | <b>534</b>                              | [4261] (99)                                | 0.12                           |
| 20         | 451                         | 3.37            | 439                        | <b>535</b>                              | [3481] (84)                                | 0.11                           |
| 40         | 451                         | 3.38            | 452                        | <b>541</b>                              | [3688] (90)                                | 0.07                           |
| 80         | 455                         | 3.38            | 452                        | <b>537</b>                              | [3356] (82)                                | 0.07                           |
| 100        | 458                         | 3.37            | 457                        | <b>543</b>                              | [3417] (85)                                | 0.07                           |

<sup>a</sup> Excited at  $\lambda_{\text{max}}$     <sup>b</sup> Absolute fluorescence quantum yield    conc. = 10<sup>-5</sup> M in toluene

## Halochromic properties of **BF<sub>2</sub>Tz 3** upon the addition of acids

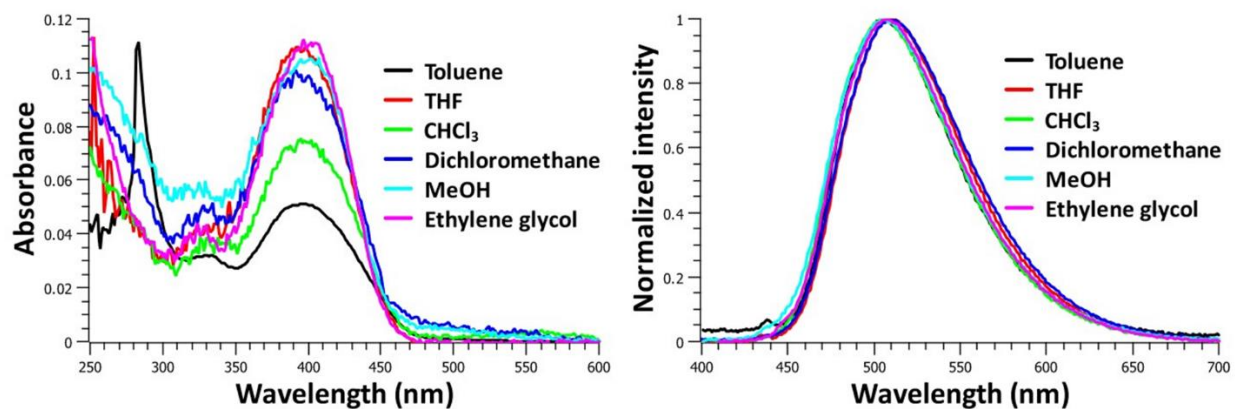

Fig. S5 Absorption (left) and emission (left) properties of **BF<sub>2</sub>Tz 3** upon addition of B(C<sub>6</sub>F<sub>5</sub>)<sub>3</sub>.

Table S9 Photophysical properties of **BF<sub>2</sub>Tz 3** upon addition of B(C<sub>6</sub>F<sub>5</sub>)<sub>3</sub>.

| Equivalent | $\lambda_{\text{abs}}$ (nm) | $\lambda_{\text{ex}}$ (nm) | $\lambda_{\text{em}}$ (nm) <sup>a</sup> | $\nu_{\text{ss}}$ [cm <sup>-1</sup> ] (nm) | $\Phi_{\text{F}}$ <sup>b</sup> |
|------------|-----------------------------|----------------------------|-----------------------------------------|--------------------------------------------|--------------------------------|
| 0          | <b>380</b>                  | 392                        | <b>505</b>                              | [6513] (125)                               | 0.15                           |
| 0.1        | 382<br><b>459</b>           | 481                        | <b>541</b>                              | [3302] (82)                                | 0.21                           |
| 0.2        | <b>461</b>                  | 479                        | <b>538</b>                              | [3104] (77)                                | 0.17                           |
| 0.4        | <b>470</b>                  | 480                        | <b>538</b>                              | [2689] (68)                                | 0.26                           |
| 0.6        | <b>472</b>                  | 479                        | <b>538</b>                              | [2599] (66)                                | 0.21                           |
| 0.8        | <b>474</b>                  | 480                        | <b>538</b>                              | [2509] (64)                                | 0.27                           |
| 1          | <b>478</b>                  | 480                        | <b>541</b>                              | [2436] (63)                                | 0.24                           |

conc. = 10<sup>-5</sup> in toluene



## Photophysical properties of **BF<sub>2</sub>Tz** in a solid state

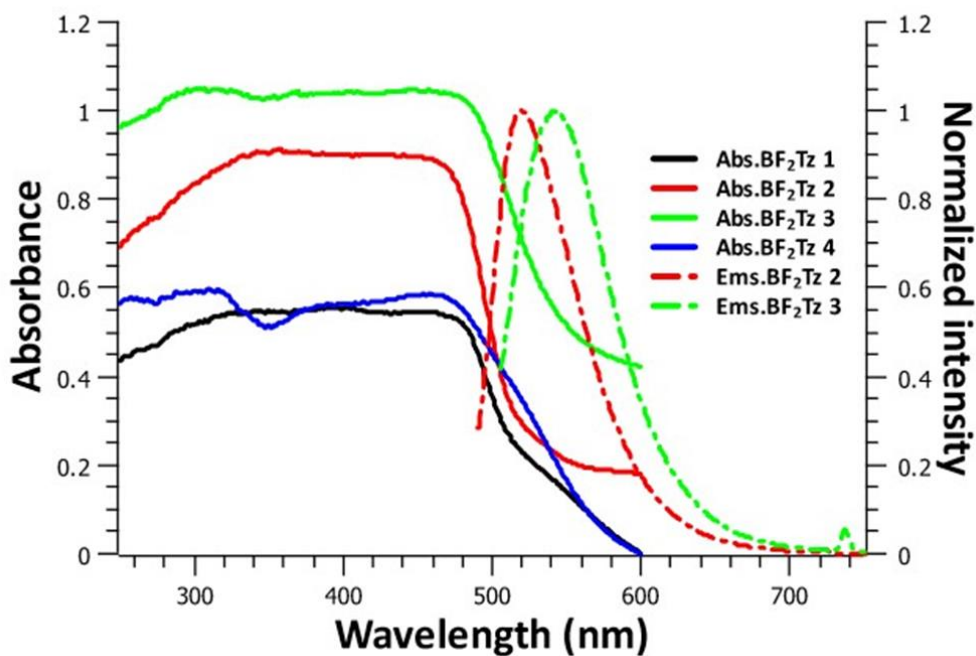

Fig. S6 Absorption and emission spectra of **BF<sub>2</sub>Tz 2** and **BF<sub>2</sub>Tz 3** in a solid state.

Table S10 Photophysical properties of **BF<sub>2</sub>Tz** in a solid state.

| Thiazole                  | $\lambda_{\text{abs}}$ (nm) | $\log \epsilon$ | $\lambda_{\text{ex}}$ (nm) | $\lambda_{\text{em}}$ (nm) <sup>a</sup> | $\nu_{\text{ss}}$ [cm <sup>-1</sup> ] (nm) | $\Phi_{\text{F}}$ <sup>b</sup> |
|---------------------------|-----------------------------|-----------------|----------------------------|-----------------------------------------|--------------------------------------------|--------------------------------|
| <b>BF<sub>2</sub>Tz 1</b> | 472                         | -               | -                          | -                                       | -                                          | -                              |
| <b>BF<sub>2</sub>Tz 2</b> | 463                         | -               | 481                        | 520                                     | [2367] (57)                                | 0.08                           |
| <b>BF<sub>2</sub>Tz 3</b> | 474                         | -               | 491                        | 541                                     | [2612] (67)                                | 0.11                           |
| <b>BF<sub>2</sub>Tz 4</b> | <b>468</b>                  | -               | -                          | -                                       | -                                          | -                              |

<sup>a</sup>Excited in  $\lambda_{\text{max}}$  <sup>b</sup>Absolute fluorescence of quantum yield

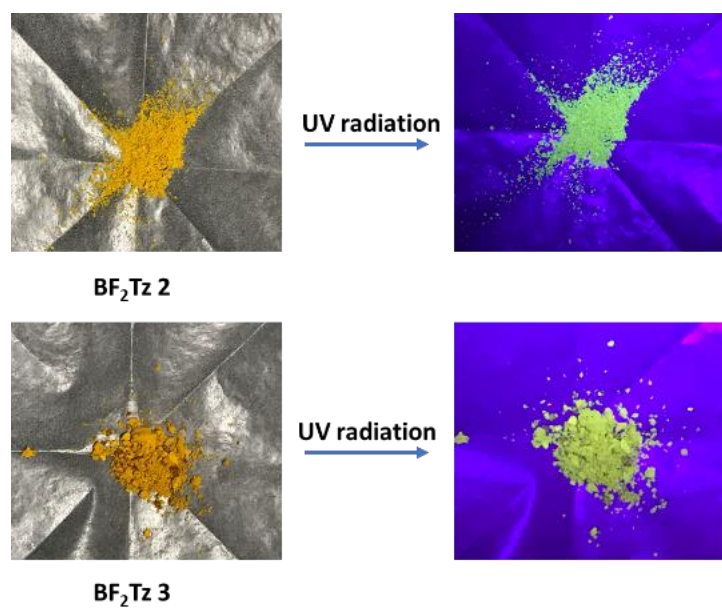

Fig. S7 Emission of **BF<sub>2</sub>Tz 2** and **BF<sub>2</sub>Tz 3** in a solid state.

## X-ray crystallography data of **BF<sub>2</sub>Tz 1**.

Table S11 X-ray crystallography data of **BF<sub>2</sub>Tz 1**.

|                                                                                                                         |                                                                  |
|-------------------------------------------------------------------------------------------------------------------------|------------------------------------------------------------------|
| Crystal data                                                                                                            |                                                                  |
| Chemical formula                                                                                                        | C <sub>20</sub> H <sub>15</sub> BF <sub>2</sub> N <sub>4</sub> S |
| <i>M<sub>r</sub></i>                                                                                                    | 392.23                                                           |
| Crystal system, space group                                                                                             | Triclinic, <i>P</i> <sup>-</sup> 1                               |
| Temperature (K)                                                                                                         | 293                                                              |
| <i>a</i> , <i>b</i> , <i>c</i> (Å)                                                                                      | 7.9896 (2), 9.2646 (3), 13.4601 (4)                              |
| <i>a</i> , <i>b</i> , <i>g</i> (°)                                                                                      | 105.166 (3), 96.037 (2), 108.811 (3)                             |
| <i>V</i> (Å <sup>3</sup> )                                                                                              | 890.46 (5)                                                       |
| <i>Z</i>                                                                                                                | 2                                                                |
| Radiation type                                                                                                          | Mo <i>K</i> <sub>α</sub>                                         |
| <i>m</i> (mm <sup>-1</sup> )                                                                                            | 0.22                                                             |
| Crystal size (mm)                                                                                                       | 0.20 × 0.17 × 0.14                                               |
| Data collection                                                                                                         |                                                                  |
| Diffractometer                                                                                                          | Rigaku Mercury CCD (2x2 bin mode)                                |
| Absorption correction                                                                                                   | Numerical                                                        |
| <i>T<sub>min</sub></i> , <i>T<sub>max</sub></i>                                                                         | 0.913, 0.942                                                     |
| No. of measured, independent and observed [ <i>I</i> > 2 <i>s</i> ( <i>I</i> )] reflections                             | 8310, 4063, 2984                                                 |
| <i>R<sub>int</sub></i>                                                                                                  | 0.016                                                            |
| ( <i>sin</i> <i>q</i> / <i>l</i> ) <sub>max</sub> (Å <sup>-1</sup> )                                                    | 0.650                                                            |
| Refinement                                                                                                              |                                                                  |
| <i>R</i> [ <i>F</i> <sup>2</sup> > 2 <i>s</i> ( <i>F</i> <sup>2</sup> )], <i>wR</i> ( <i>F</i> <sup>2</sup> ), <i>S</i> | 0.042, 0.115, 1.04                                               |
| No. of reflections                                                                                                      | 4063                                                             |
| No. of parameters                                                                                                       | 254                                                              |
| H-atom treatment                                                                                                        | H-atom parameters constrained                                    |
| <i>D</i> <sub>ρmax</sub> , <i>D</i> <sub>ρmin</sub> (e Å <sup>-3</sup> )                                                | 0.21, -0.18                                                      |

$^1\text{H}$  and  $^{13}\text{C}$  NMR charts for **Tz** and **BF<sub>2</sub>Tz**.

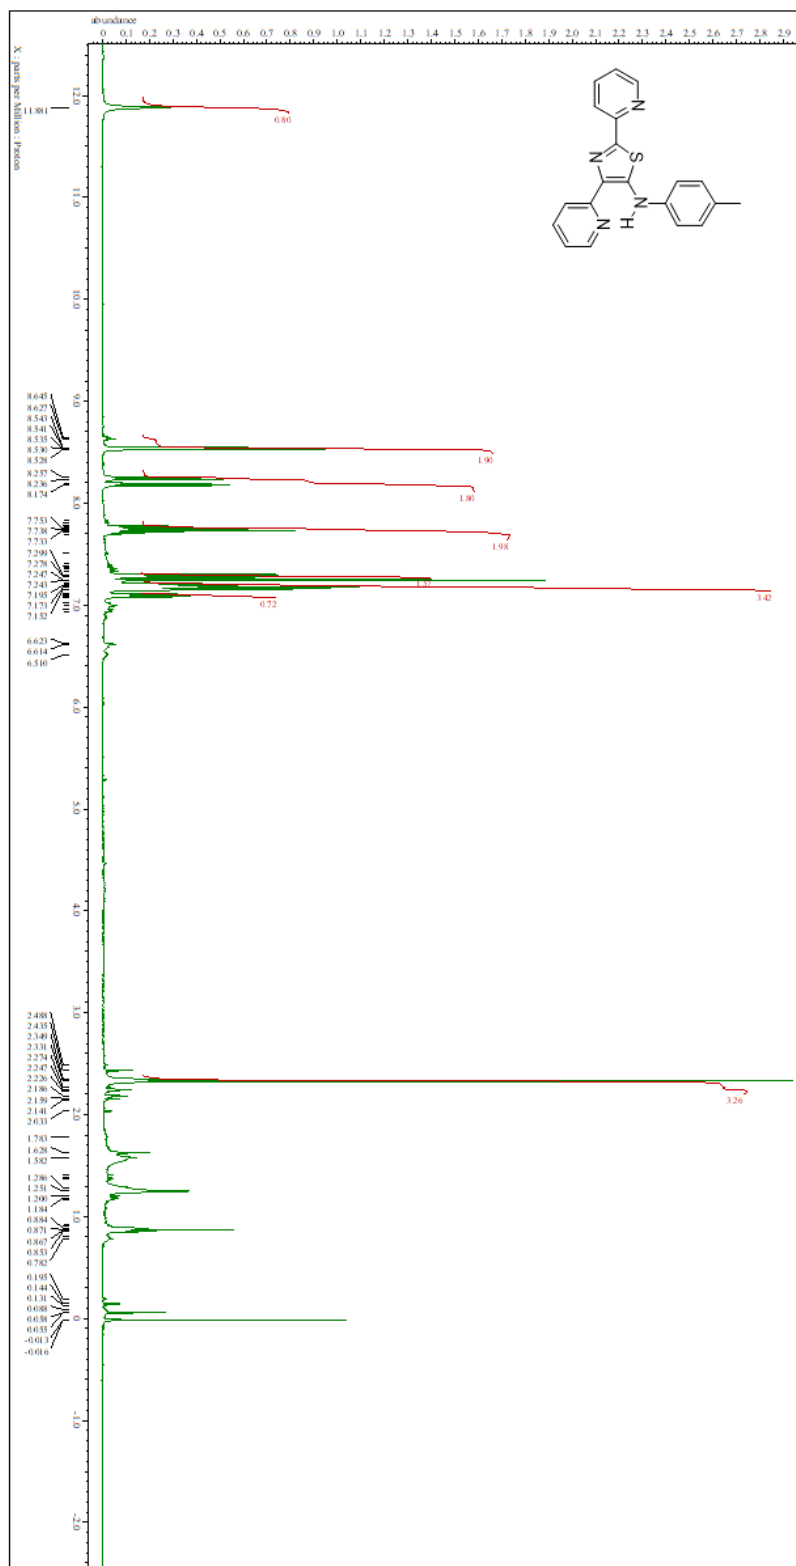

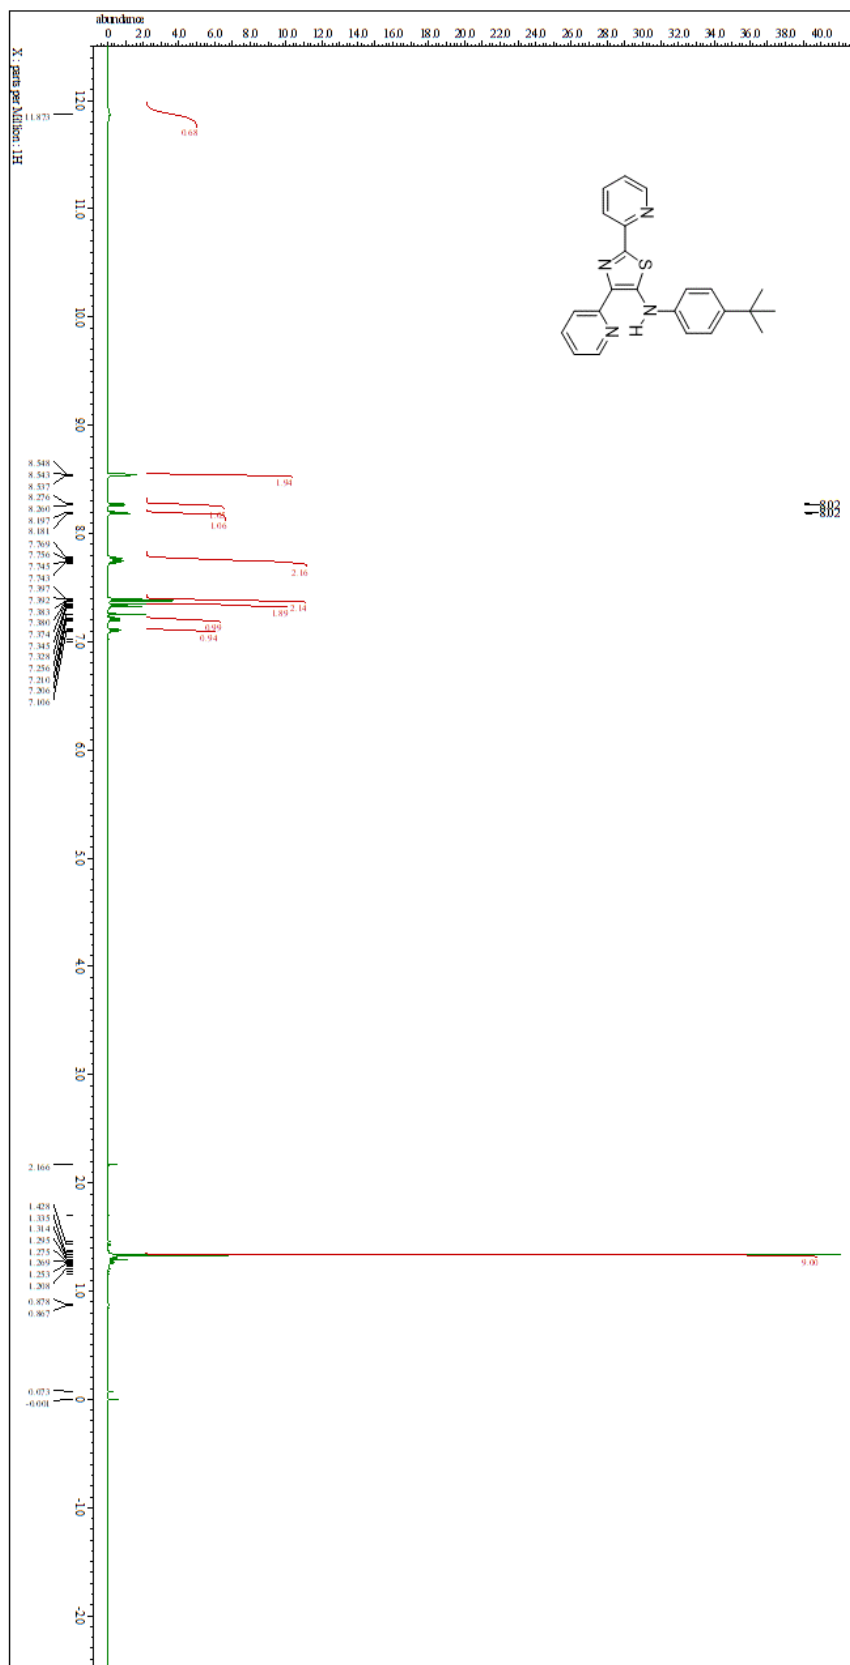

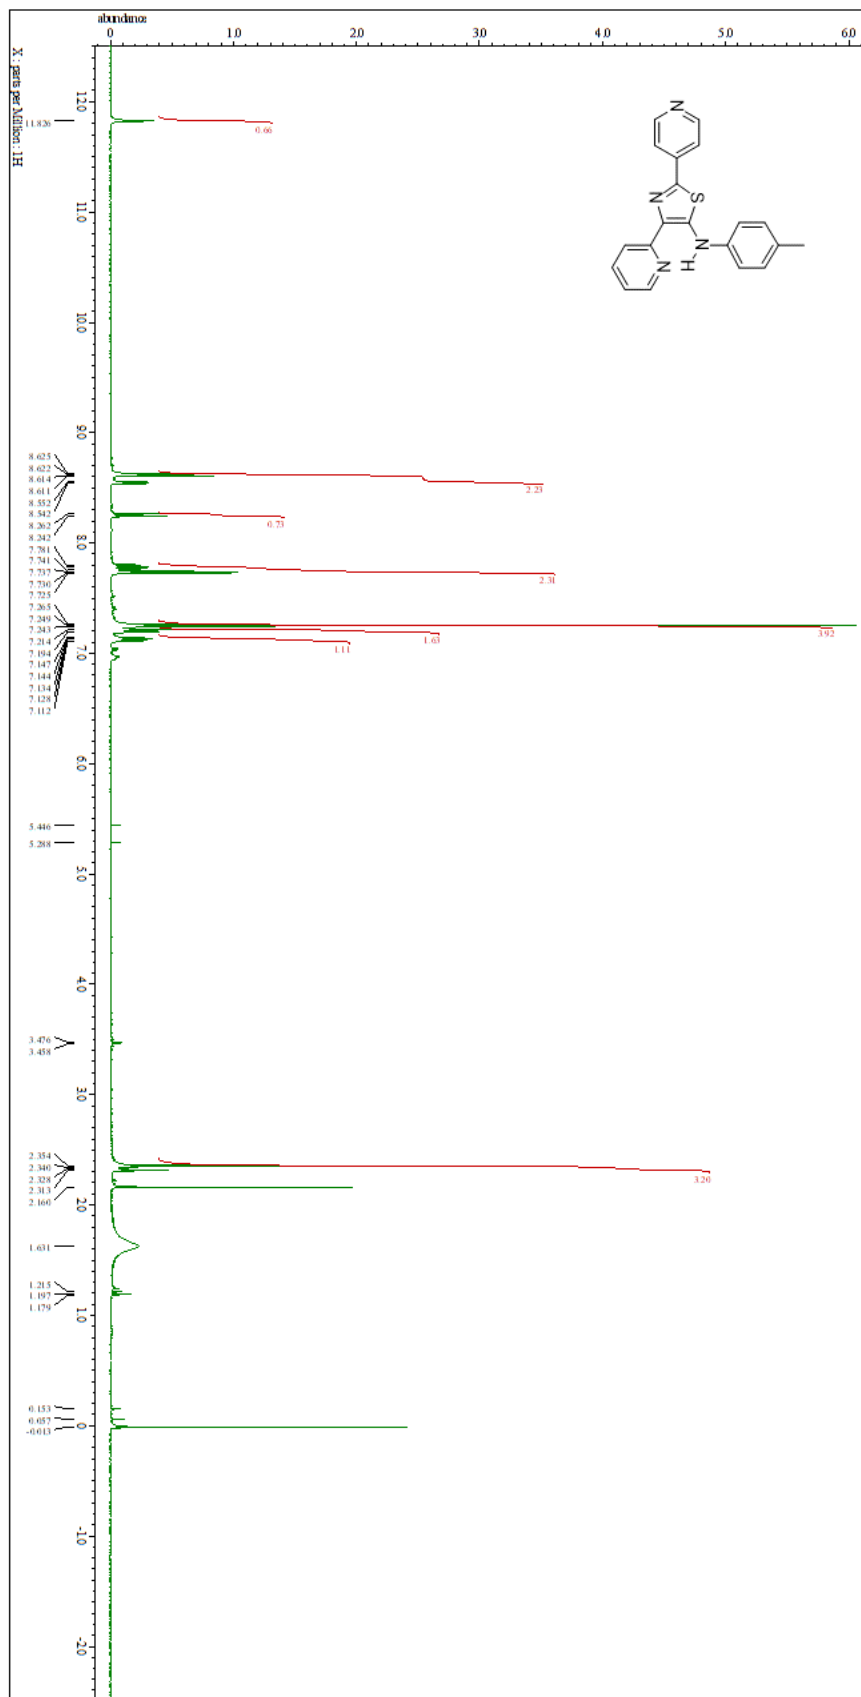

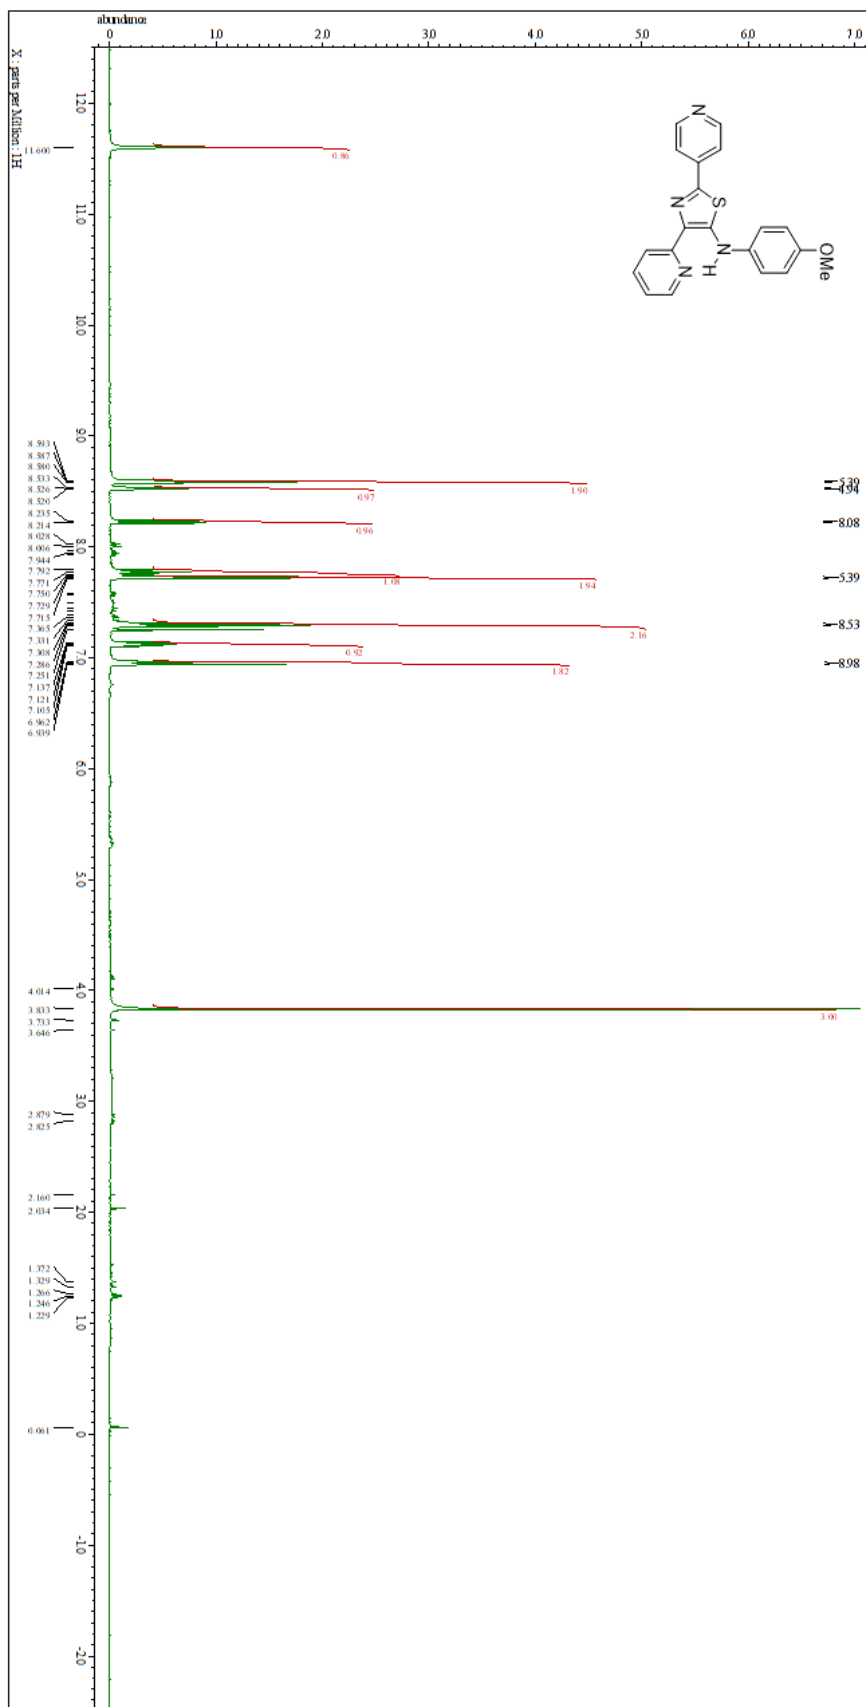

# 13C NMR for spectra for Tz

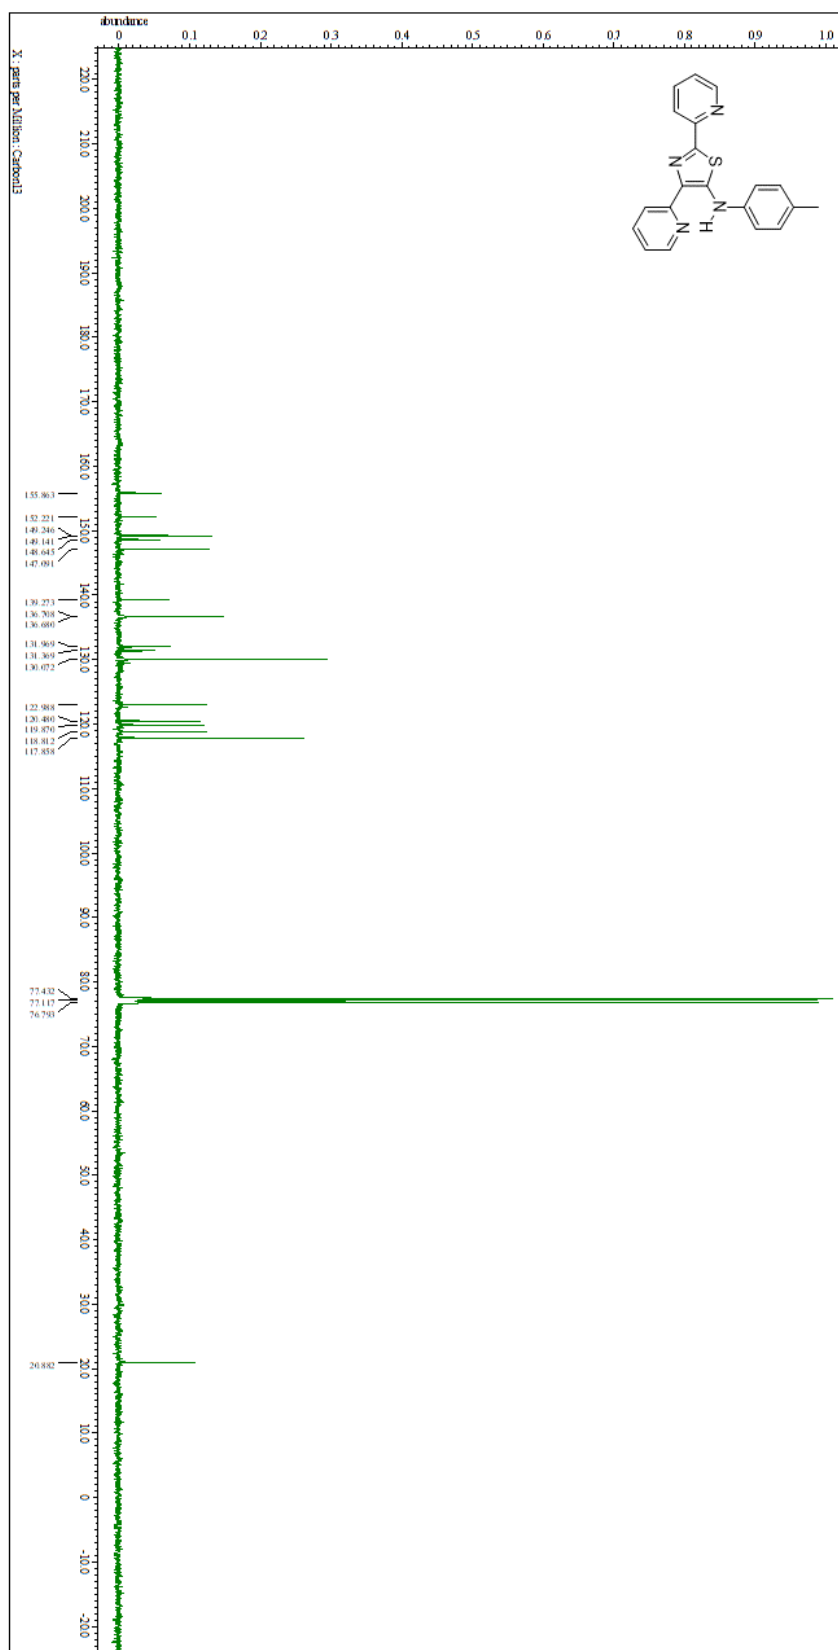



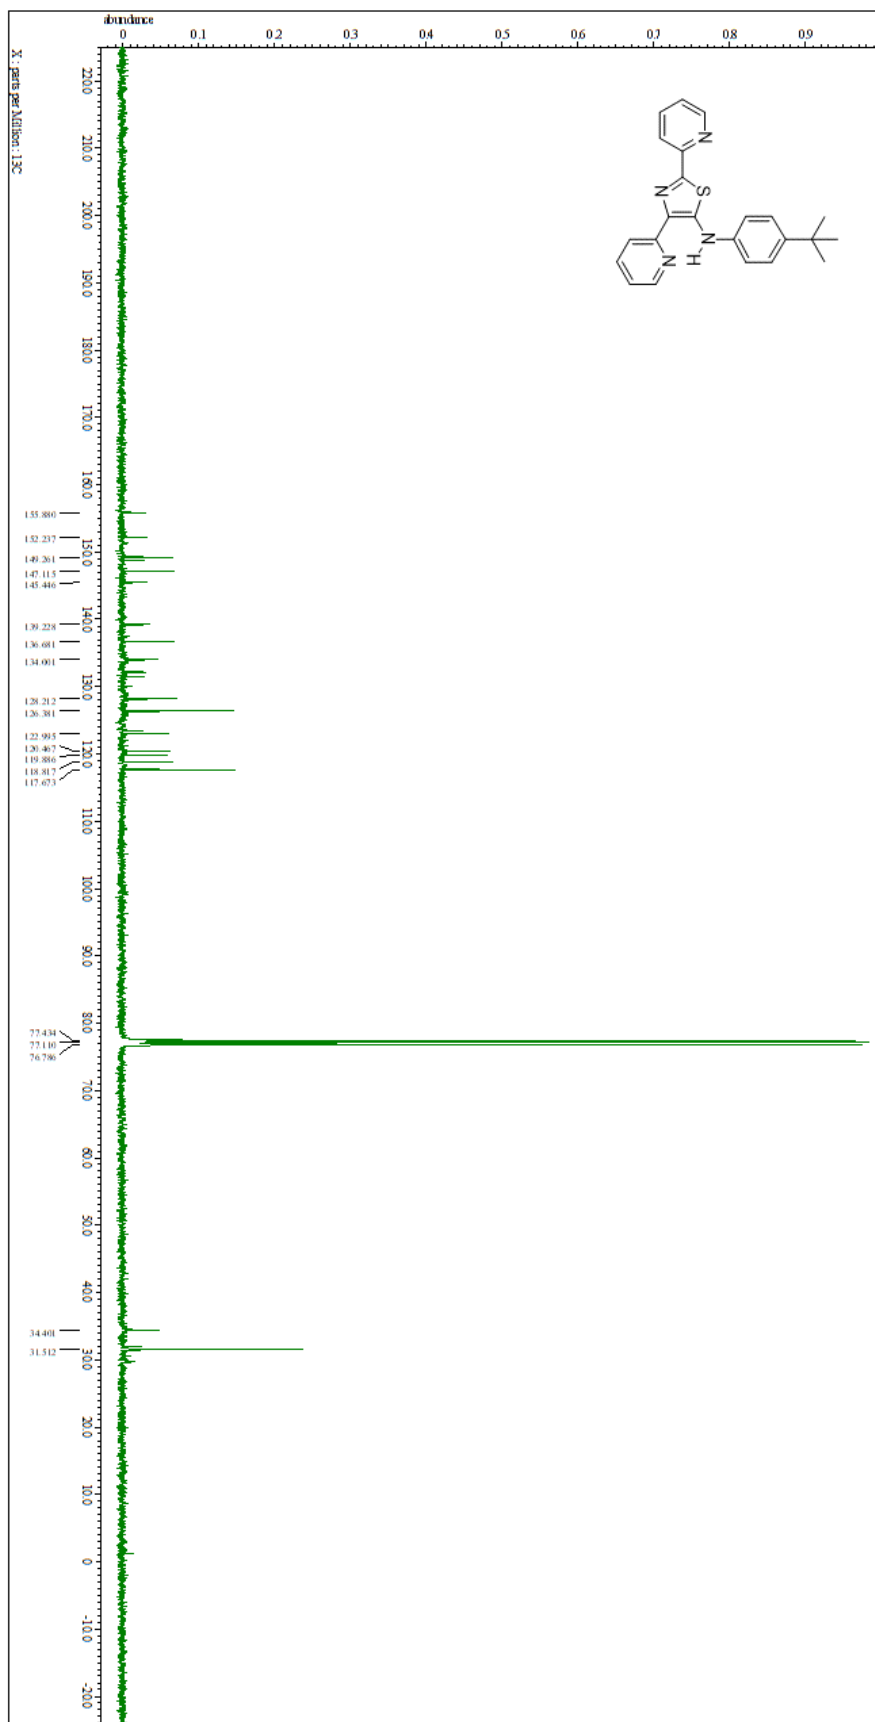

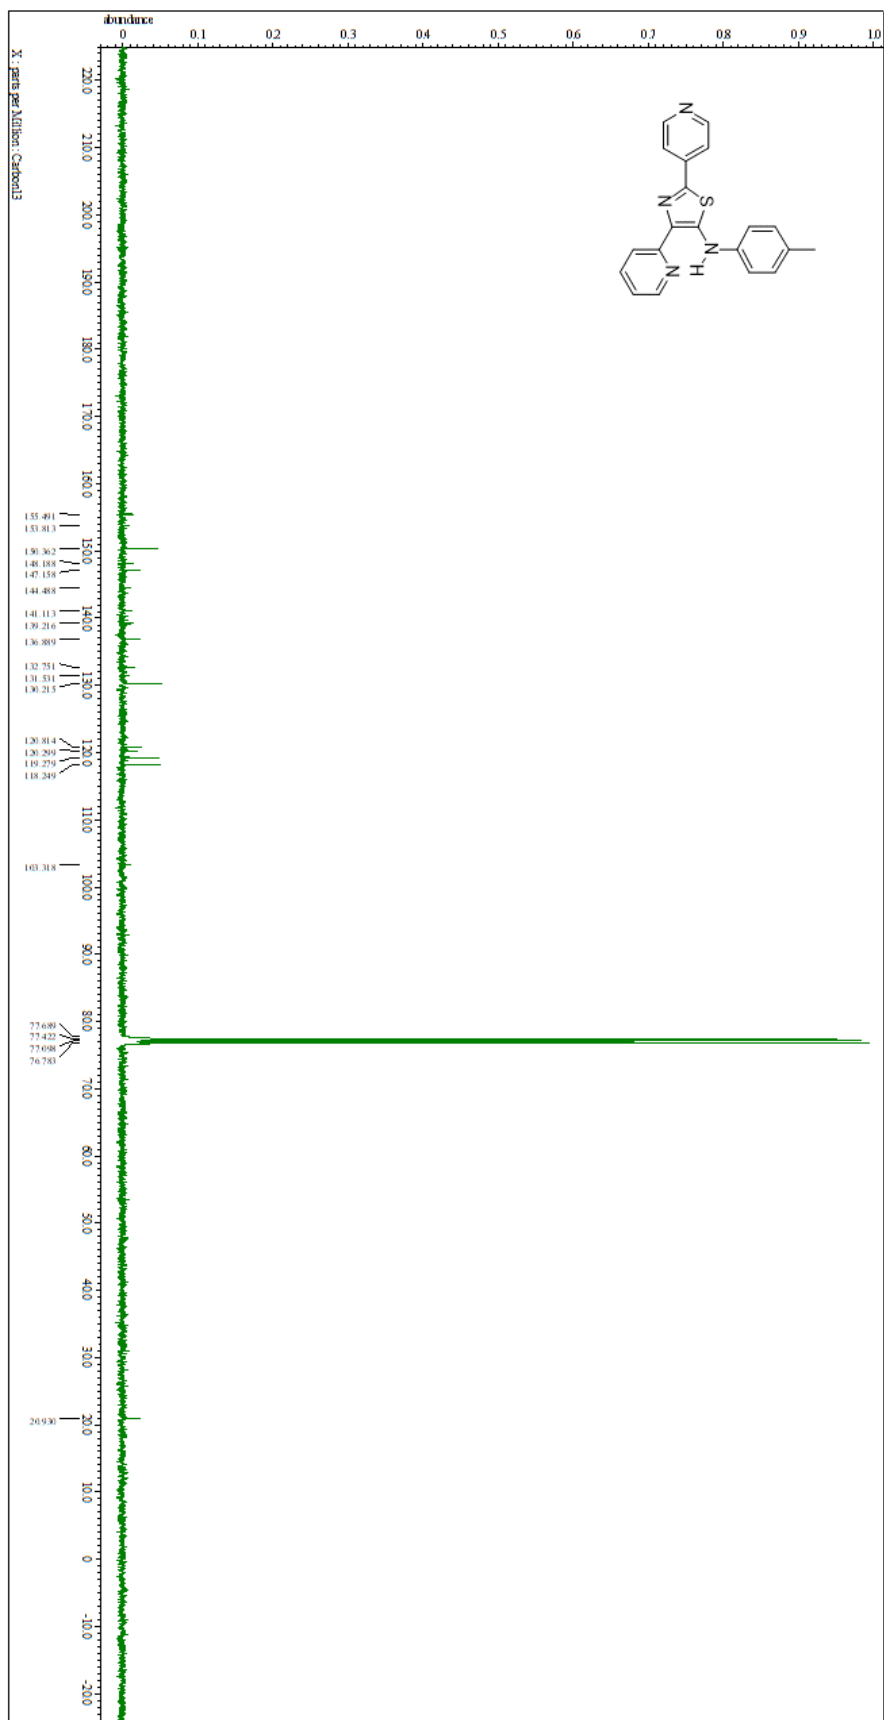

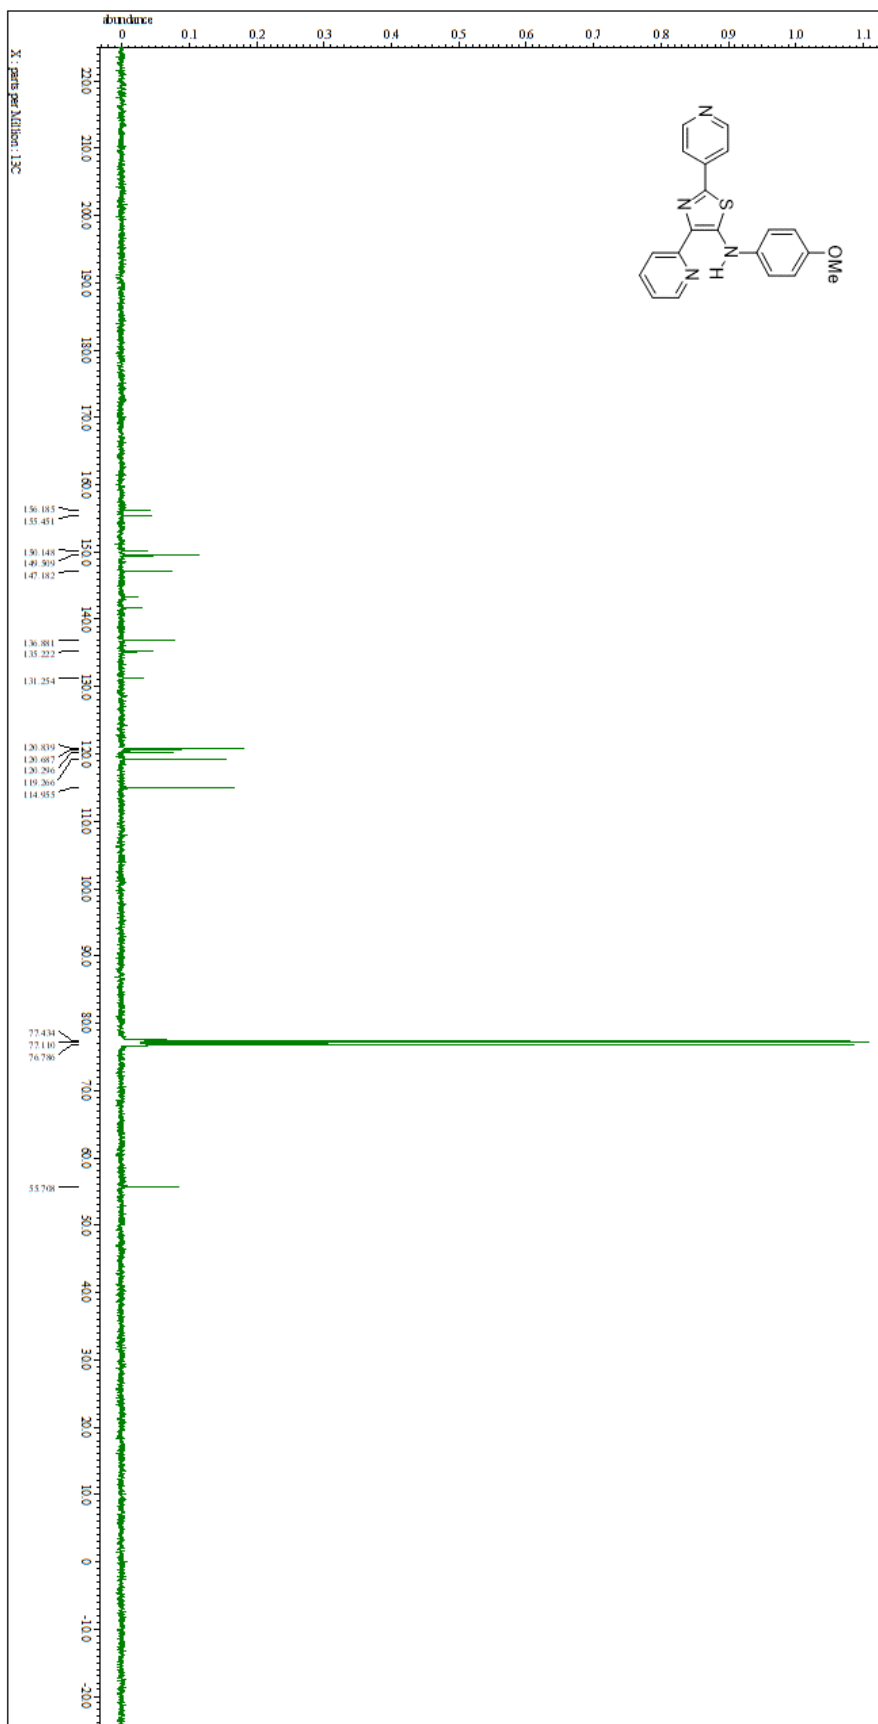

# 1H NMR of Boron complex (BF<sub>2</sub>Tz)

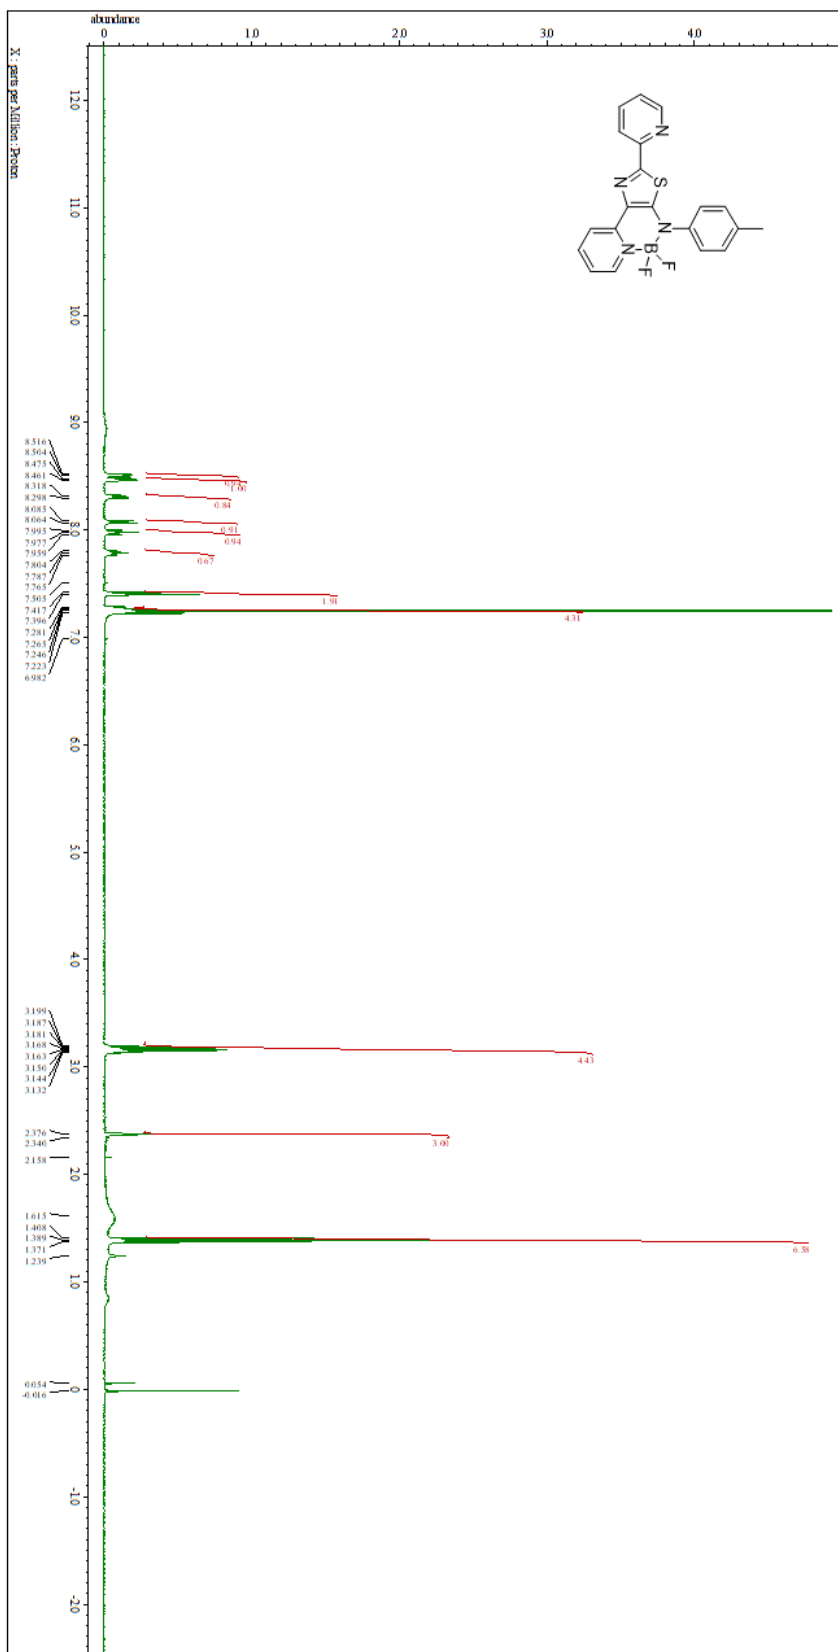

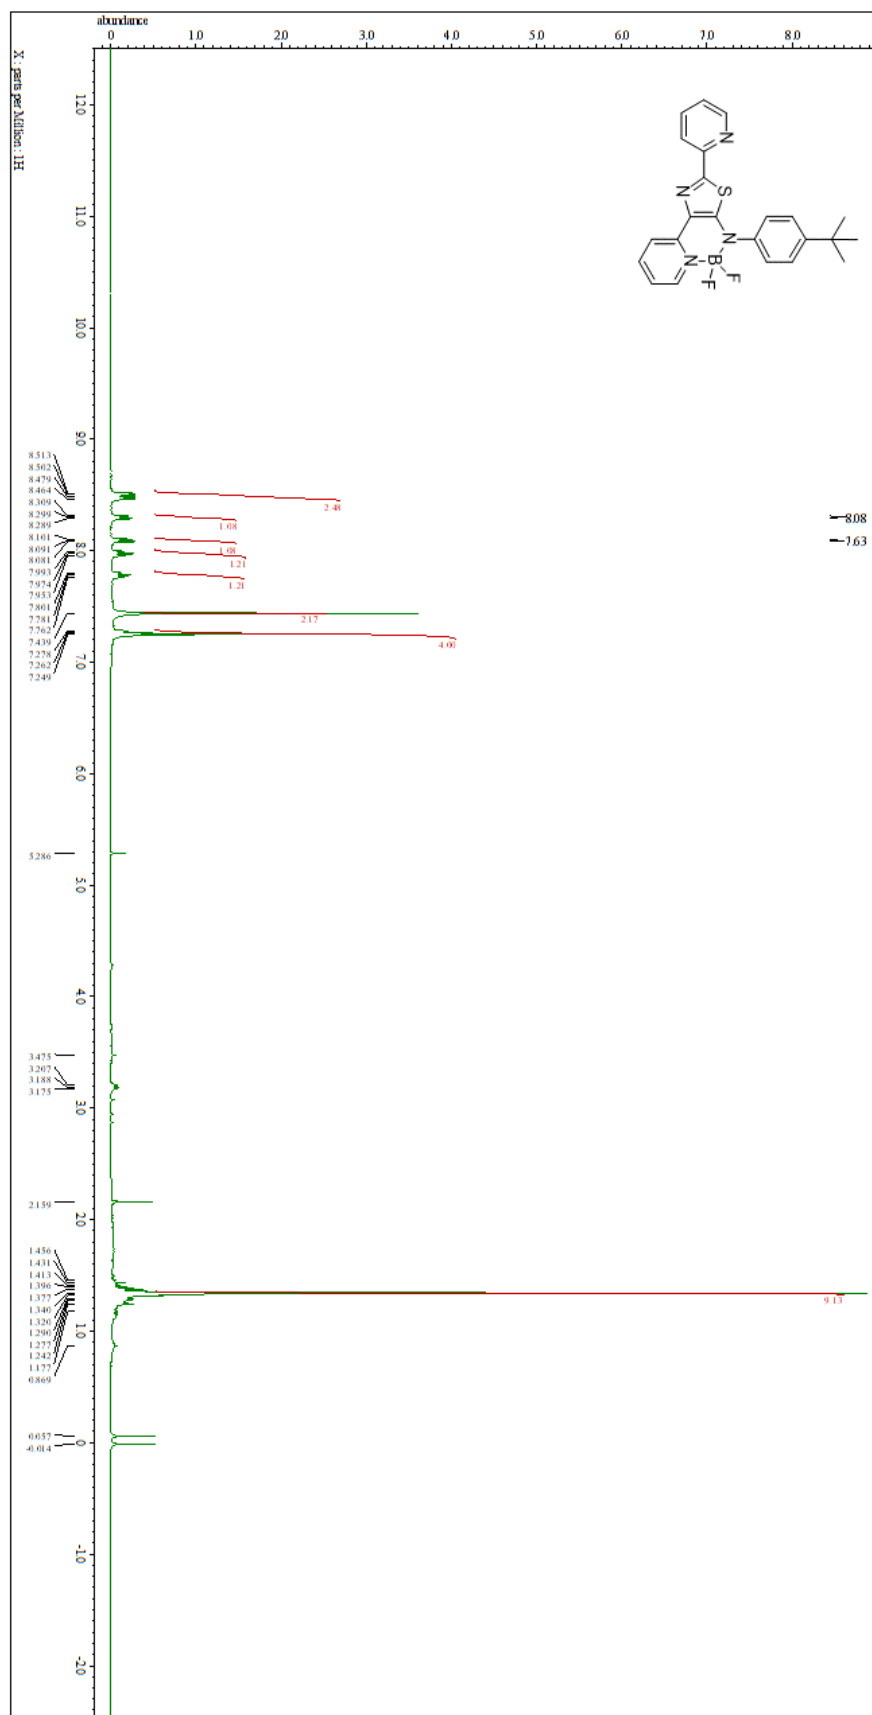

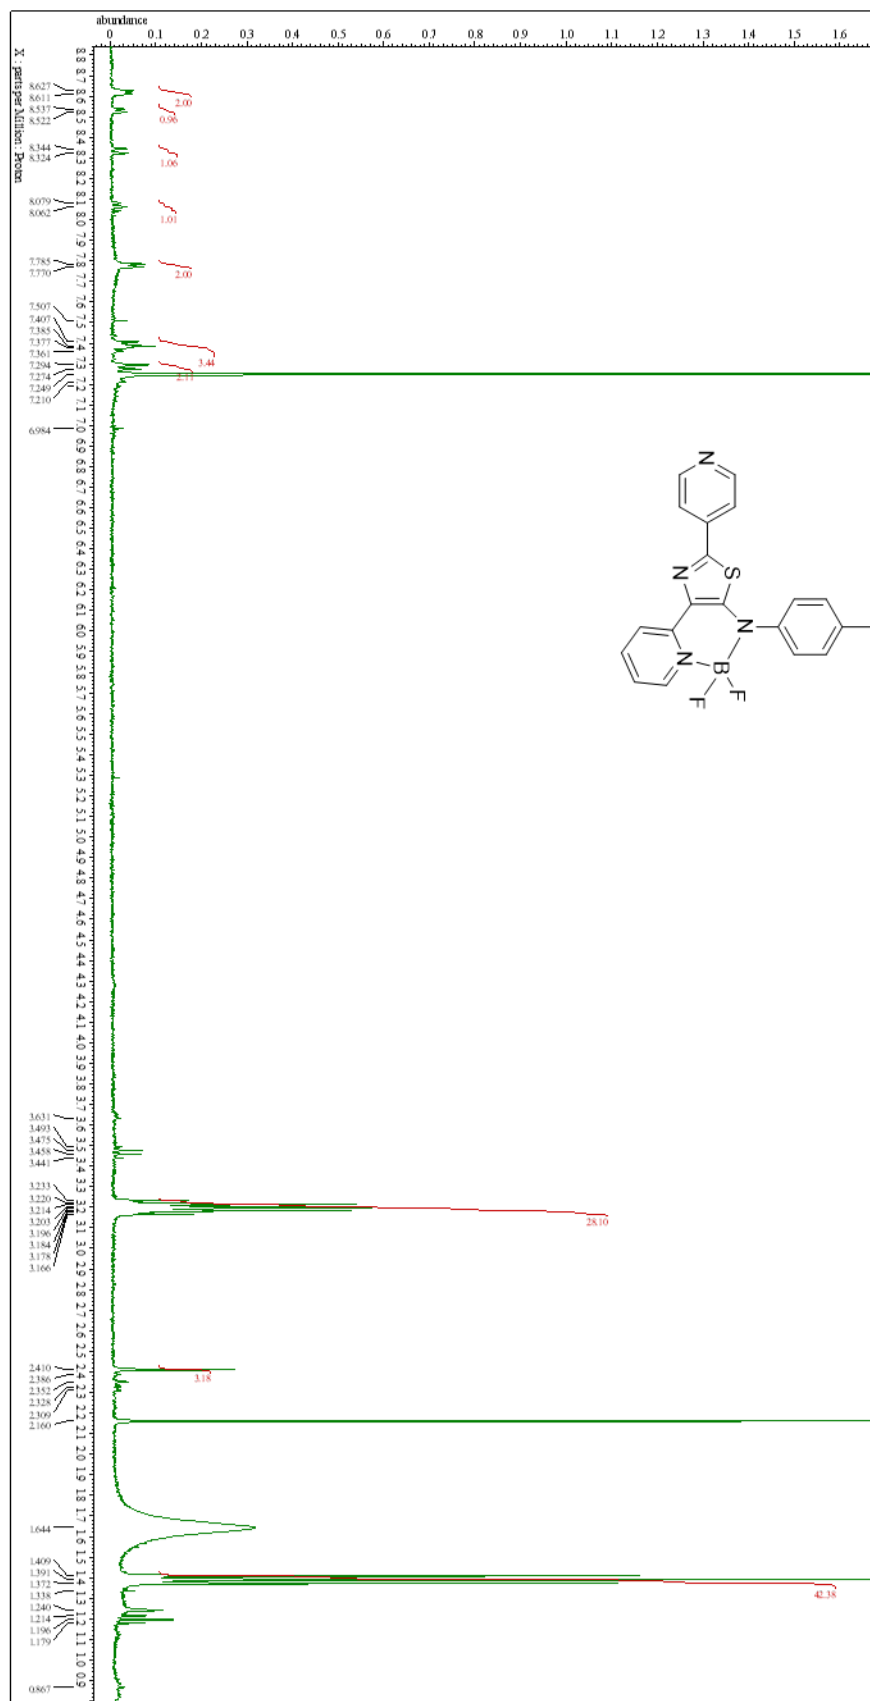

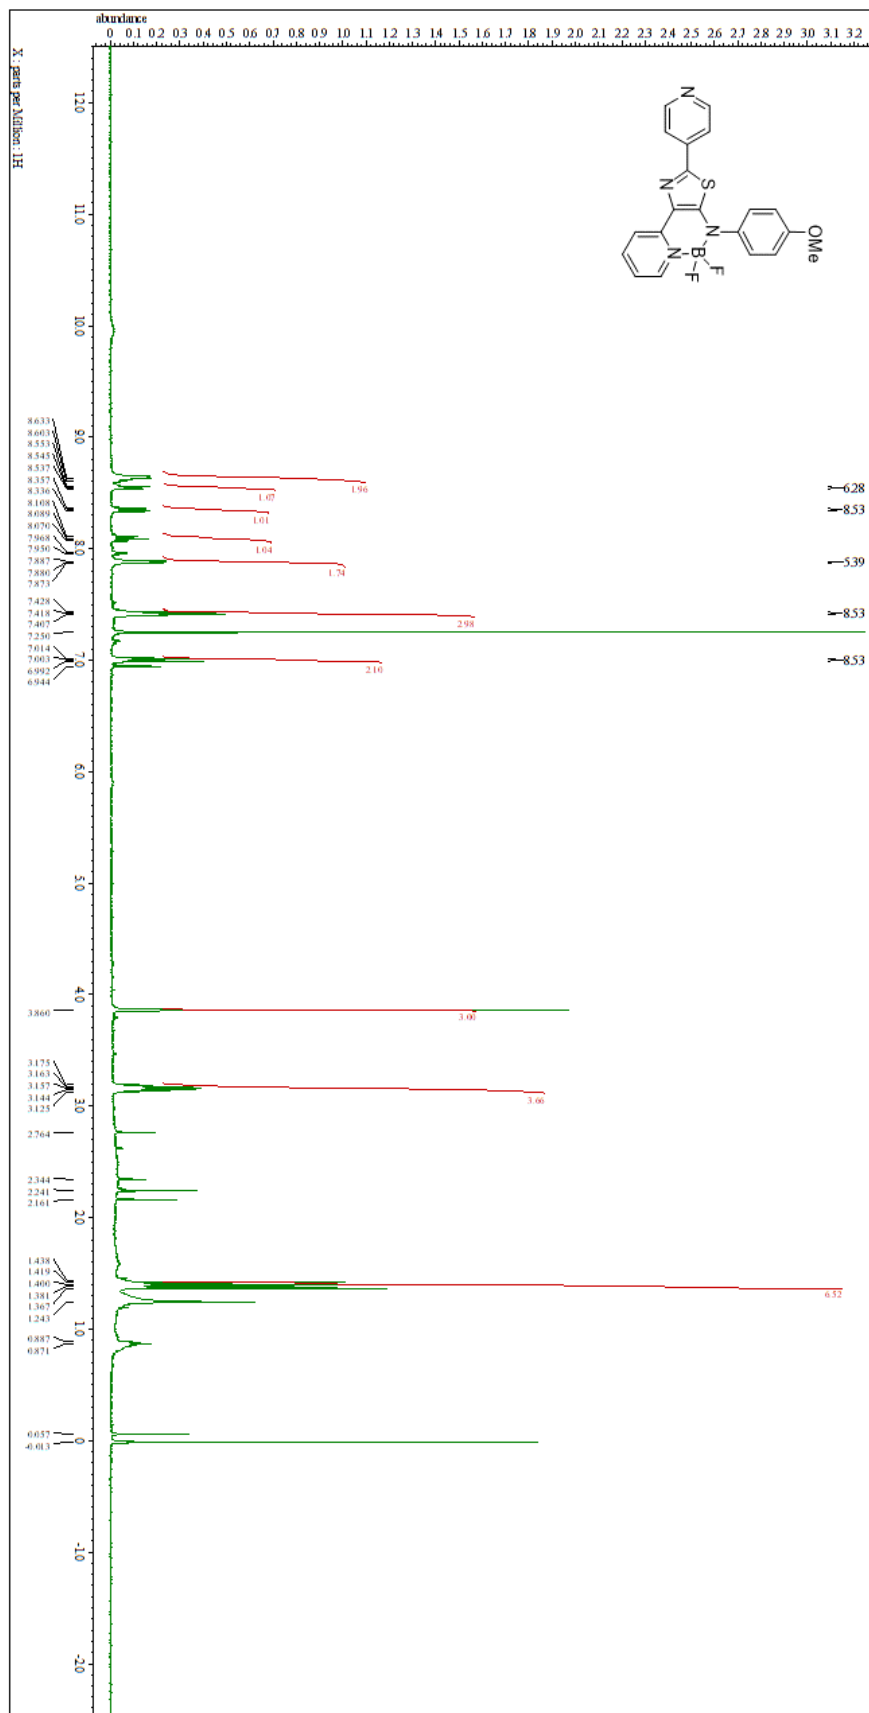

# $^{13}\text{C}$ NMR of Boron complex (BF<sub>2</sub>Tz)

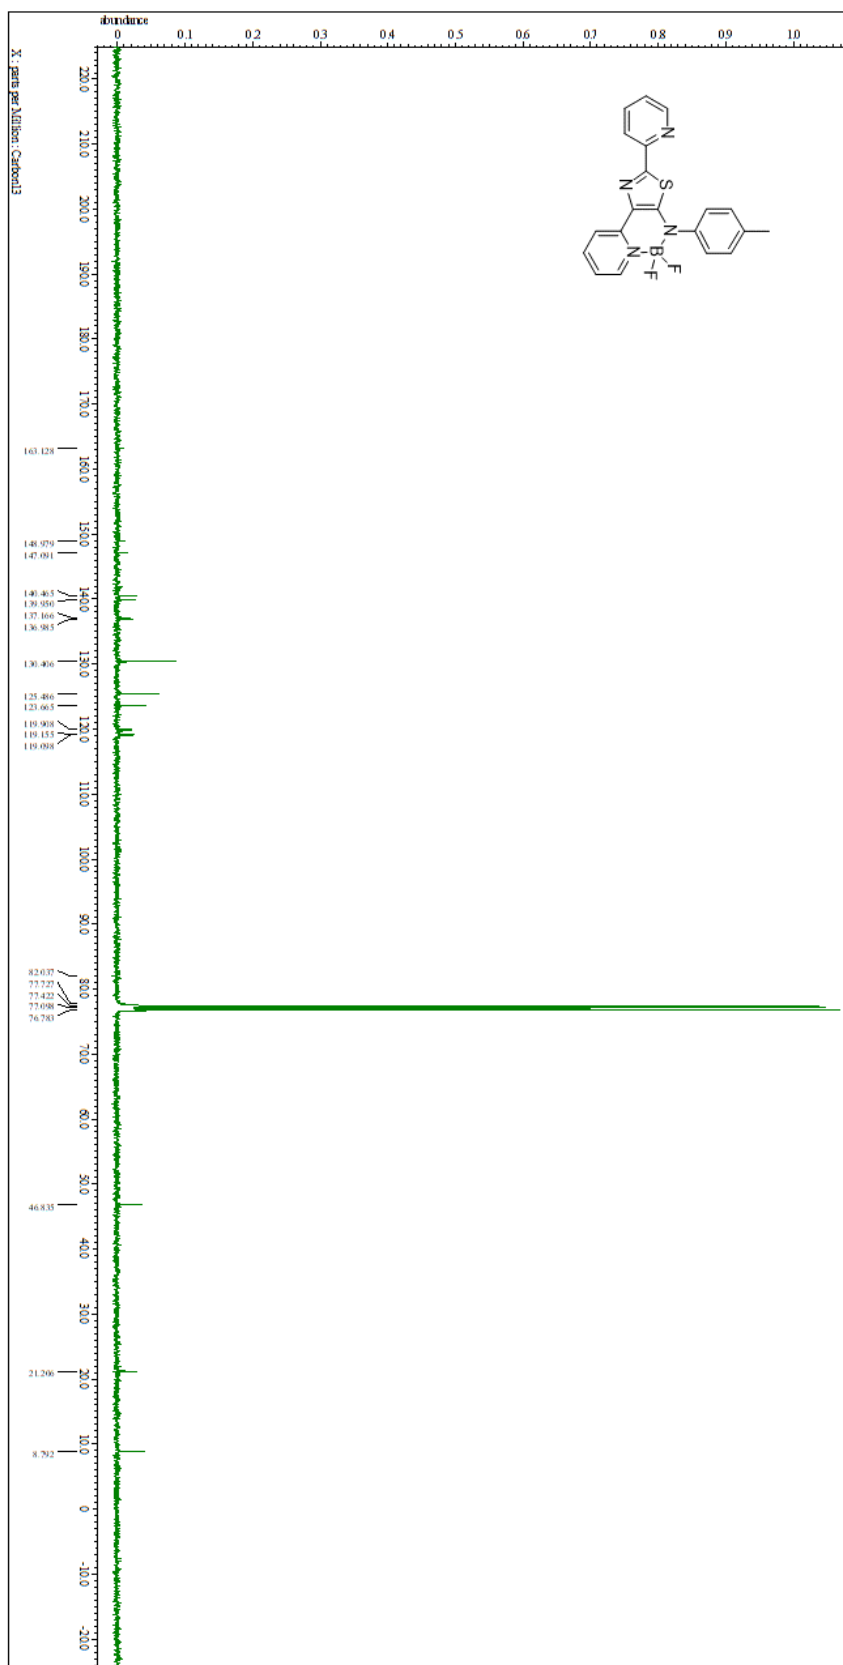



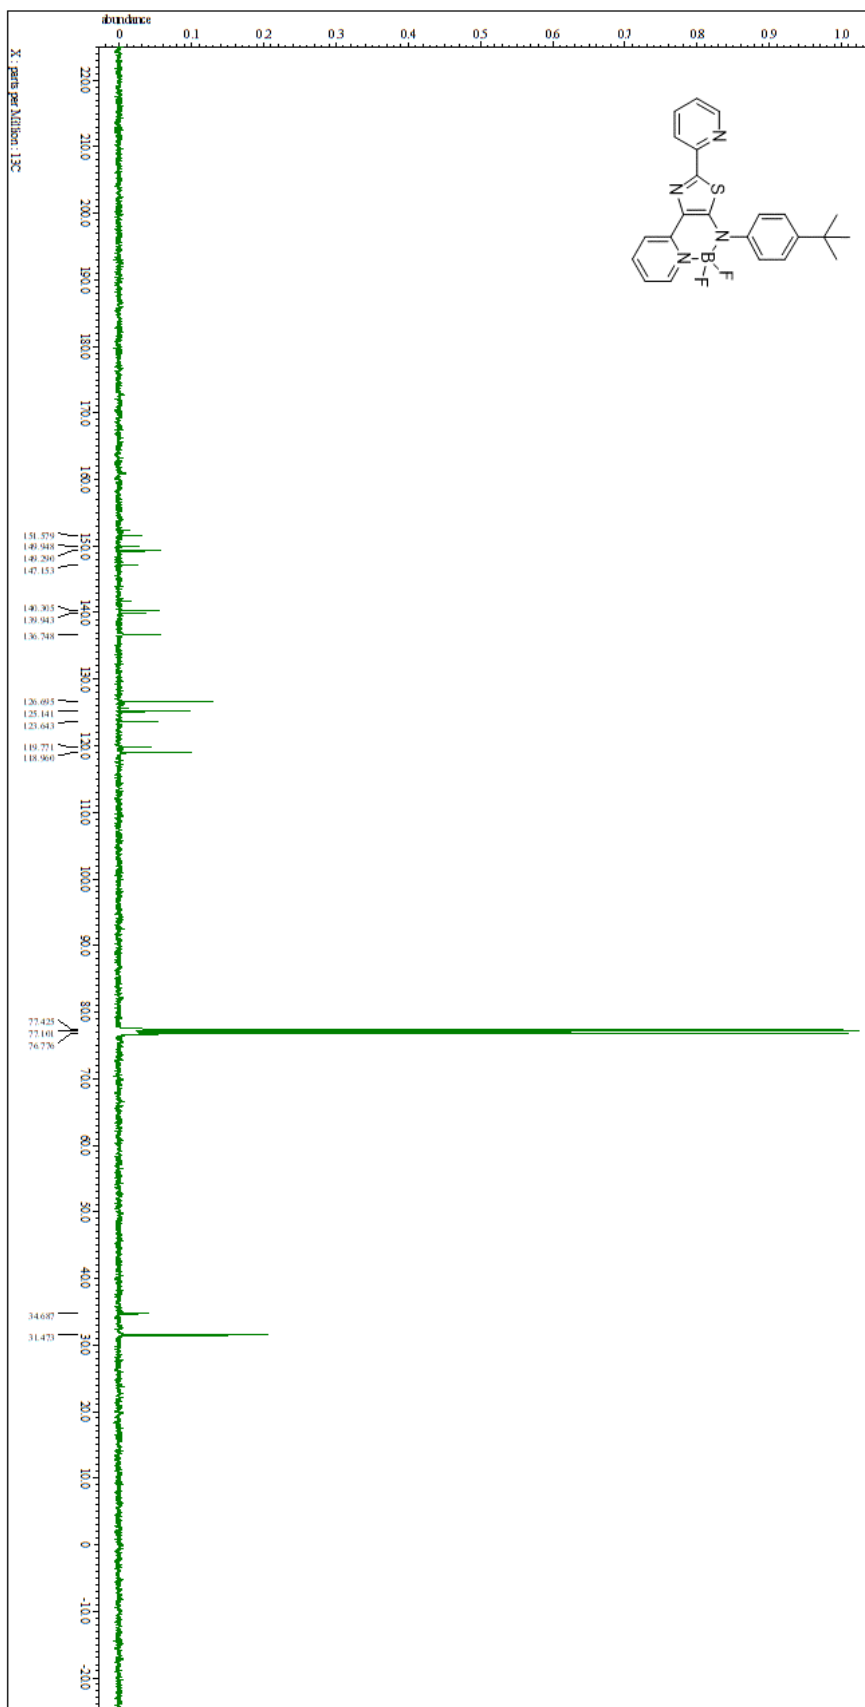

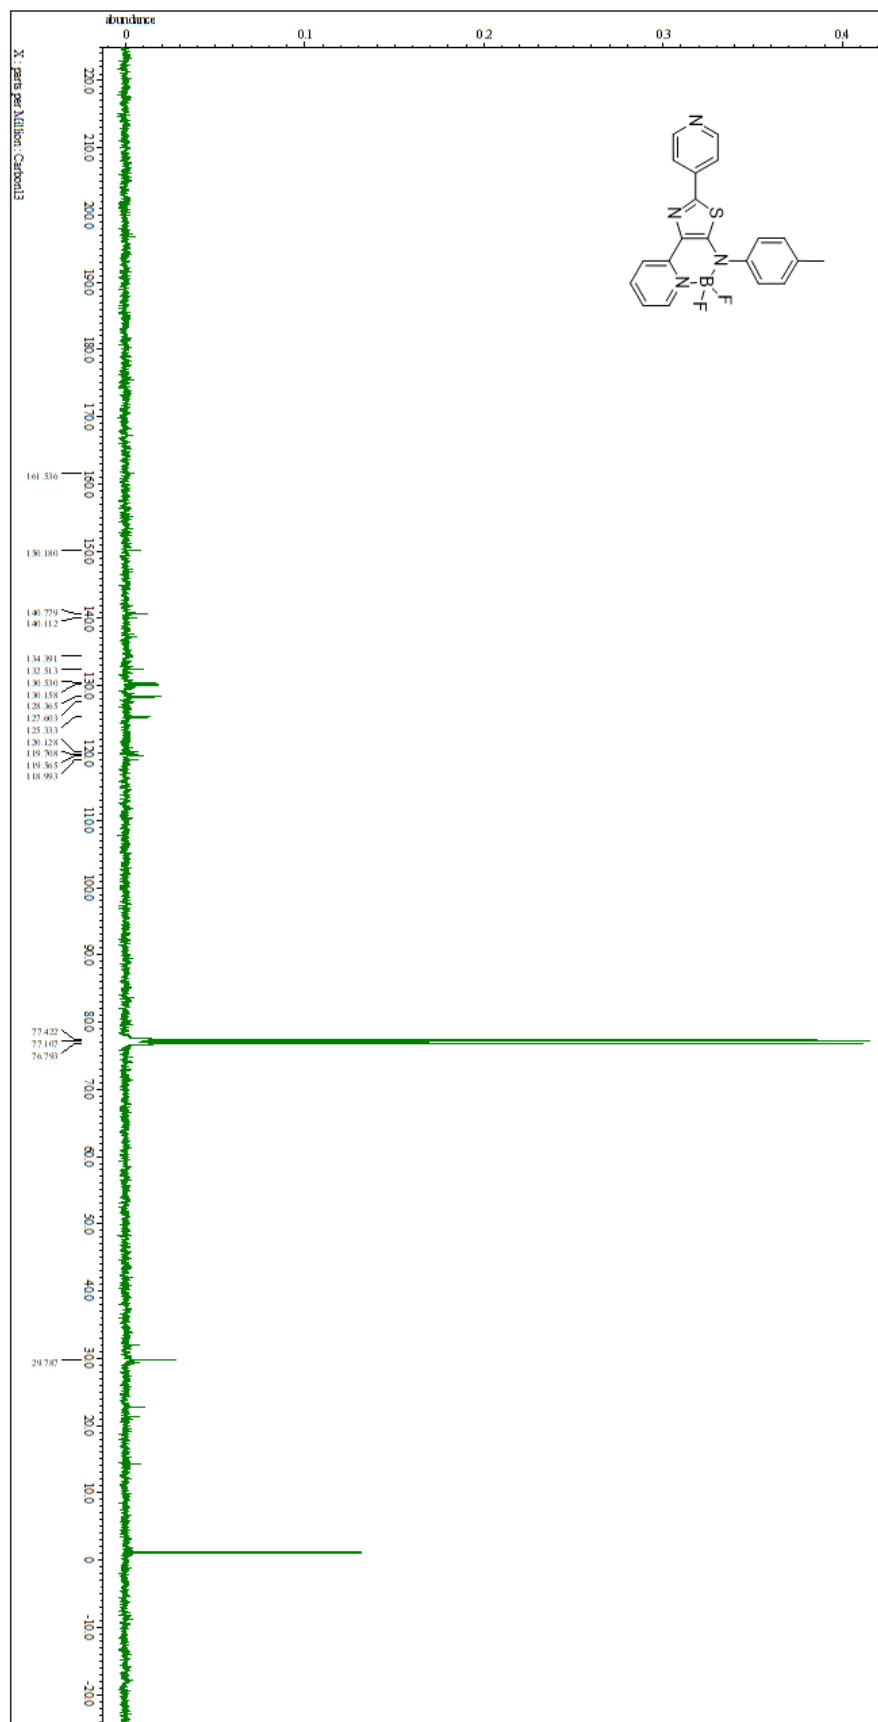

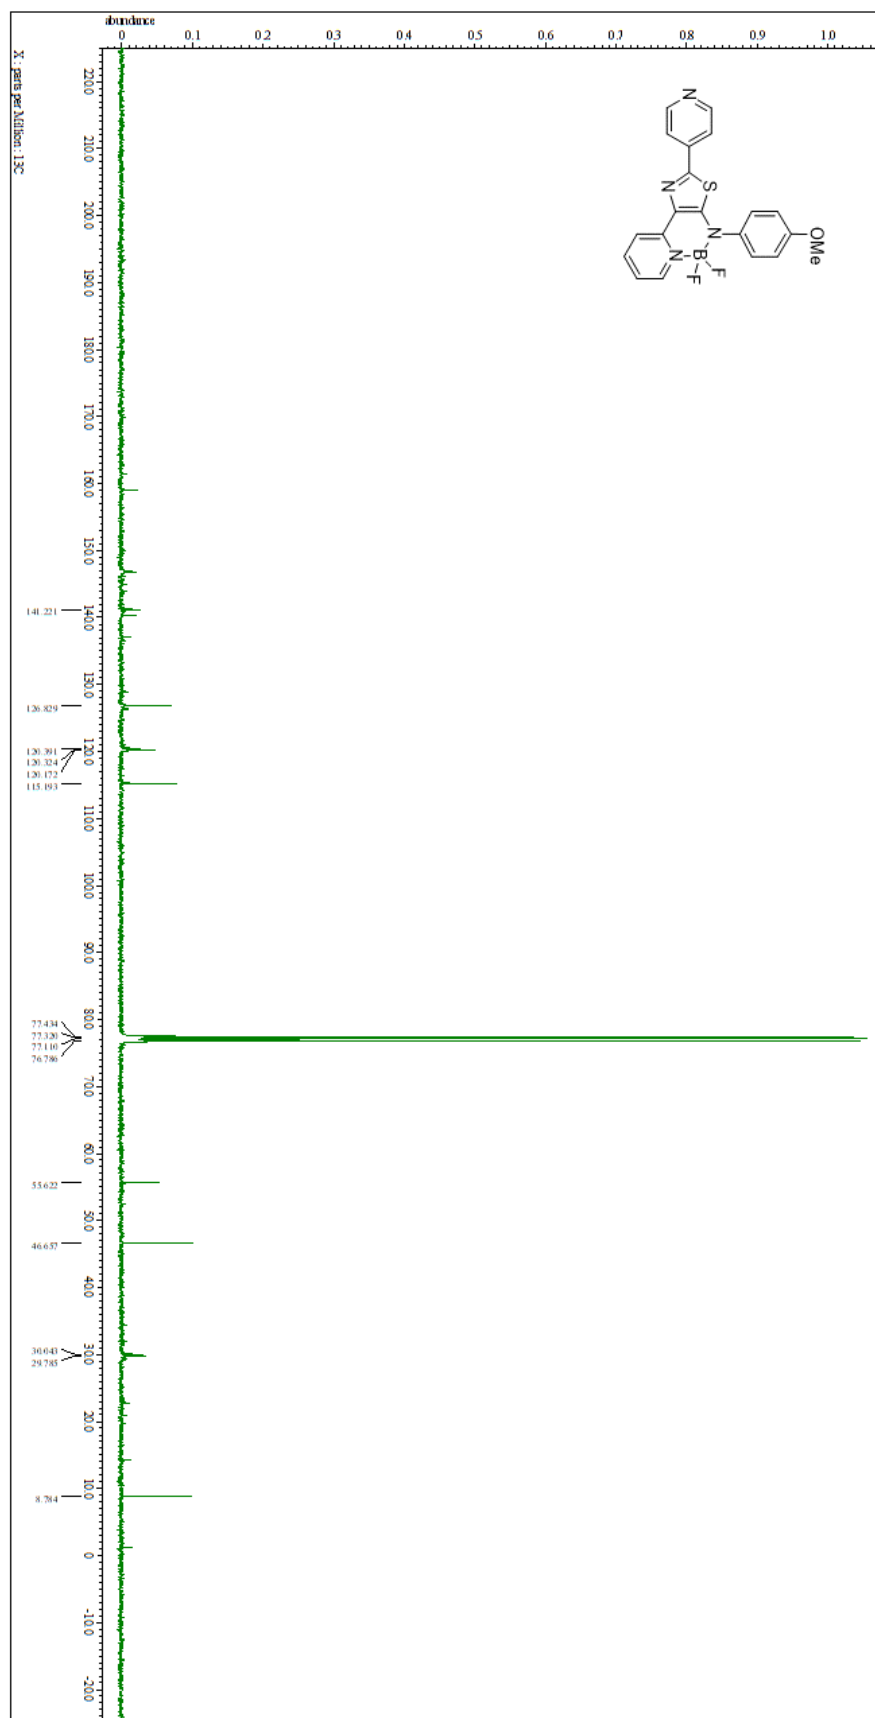

Supplement: d1ob00828e1.pdf [file d1ob00828e1.pdf]
